# Supplementary material for: Maternal and household factors affecting the dietary diversity of preschool children in eastern Ethiopia: a cross-sectional study
Source: HighWire-hosted journal article supplement (doi:10.1136/bmjopen-2023-080616), 2024-03-01
Supplement: bmjopen-2023-080616supp001_data_supplement.pdf [file bmjopen-2023-080616supp001_data_supplement.pdf]

Supplementary Table 1: Number of food groups consumed by preschool children in Haramaya, Ethiopia

| Number of Food Groups Consumed | Frequency | Percentage |
|--------------------------------|-----------|------------|
| One                            | 140       | 20.64      |
| Two                            | 109       | 16.08      |
| Three                          | 138       | 20.35      |
| Four                           | 159       | 23.45      |
| Five                           | 84        | 12.39      |
| Six                            | 35        | 5.16       |
| Seven                          | 13        | 1.92       |

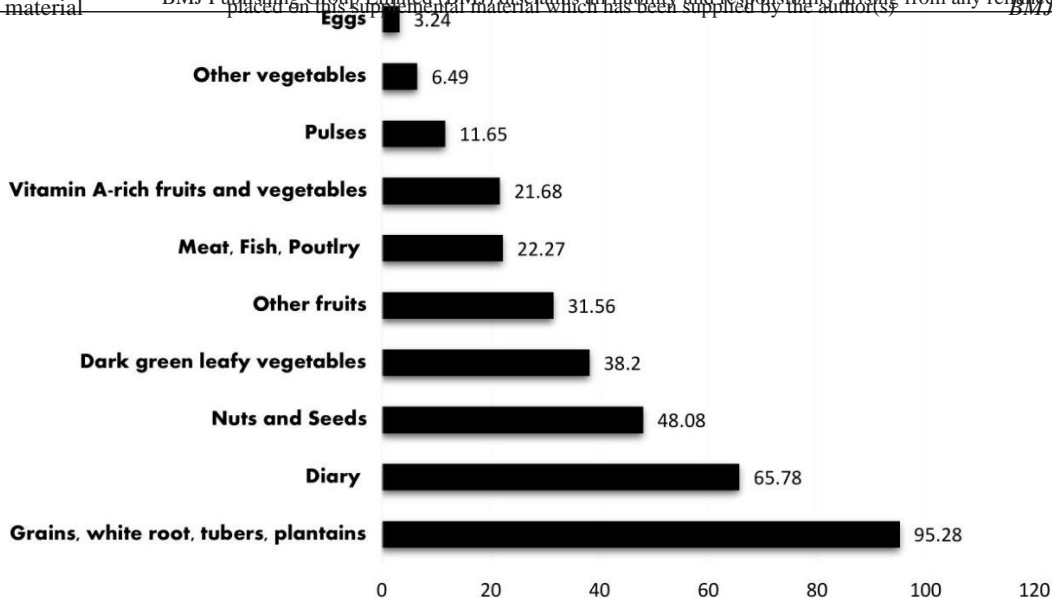

Supplementary figure 1: The proportion of food group consumption in the last 24-hours by mothers of preschool children in Haramaya, Ethiopia

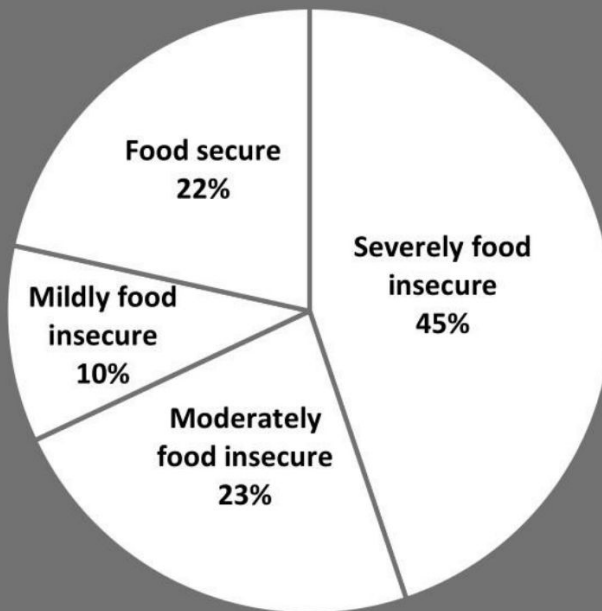

Supplementary figure 2: The prevalence of household food insecurity in households with preschool children in Haramaya, Ethiopia

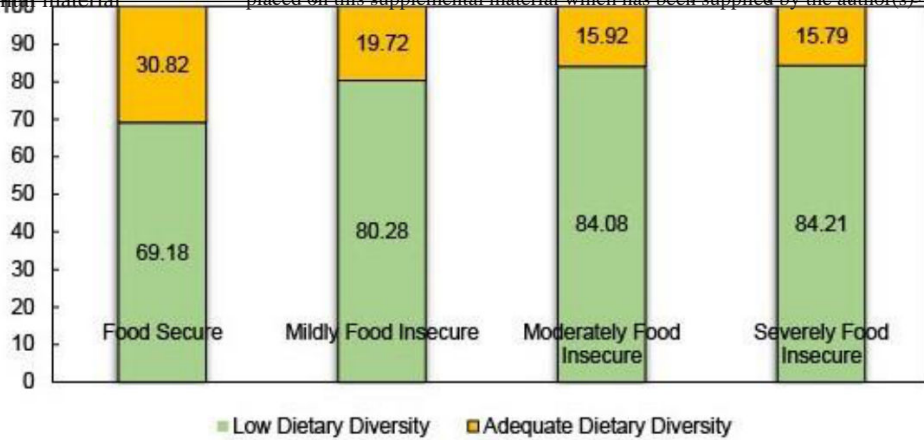

Supplementary figure 3: Dietary diversity of preschool children in food secure and insecure household in Haramaya, Ethiopia

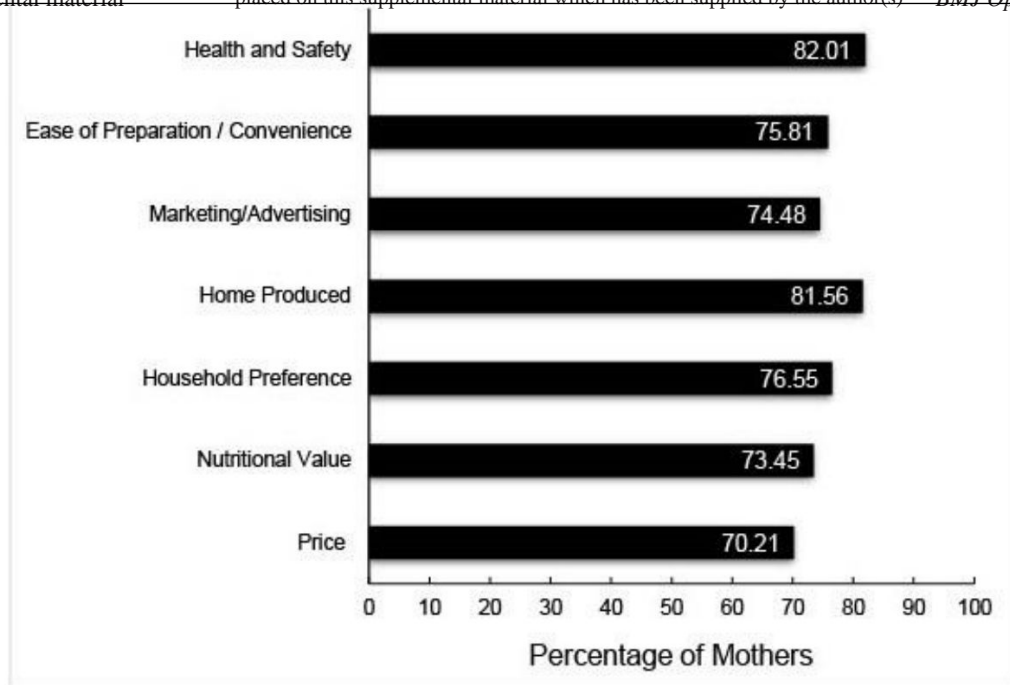

Supplementary figure 4: Factors for maternal food choices in Haramaya, Ethiopia
